# Supplementary material for: The Mediating Effects of Work Characteristics on the Relationship between Transformational Leadership and Employee Well-Being: A Meta-Analytic Investigation
Source: MDPI journal article supplement (doi:10.3390/ijerph19053133), 2022-03-07
Supplement: s1 [file s1]

Table S3. Coding Manual

| 1. STUDY DESCRIPTION |                     |                                                                                                                                                                                                                     |  |
|----------------------|---------------------|---------------------------------------------------------------------------------------------------------------------------------------------------------------------------------------------------------------------|--|
| Number               | Variable            | Coding instructions                                                                                                                                                                                                 |  |
| Missing data         |                     | Type in 999                                                                                                                                                                                                         |  |
| 1                    | Authors, Year       | Type in "Authors, Year" with the first three author names, otherwise write "et al."                                                                                                                                 |  |
| 2                    | StudyID             | Give a running number to each study included                                                                                                                                                                        |  |
| 3                    | ClusterID           | Give a running number to each sample included                                                                                                                                                                       |  |
| 4                    | Quality             | dis = dissertation<br>noi = no impact<br>Otherwise write the number of the impact, retrieved from the InCites Journal Citation Reports 2018 ( <a href="https://apps.clarivate.com">https://apps.clarivate.com</a> ) |  |
| 5                    | Type of publication | 0 = unpublished<br>1 = published<br>2 = dissertation                                                                                                                                                                |  |
| 6                    | Year                | Type in the year of publication formatted like this '19XX'                                                                                                                                                          |  |
| 7                    | continent           | India<br>North America<br>South America<br>Europe<br>Northern Europe<br>Eastern Europe<br>Africa<br>Asia<br>Mixed<br>Middle East                                                                                    |  |
| 8                    | Sample size         | Sample size of the study                                                                                                                                                                                            |  |
| 9                    | gender (female)     | Type in the number of <b>female</b> participants                                                                                                                                                                    |  |
| 10                   | Industry            | Education<br>Health care<br>Industry<br>MBA students (working at least 20 hours per week)<br>Mixed<br>Others<br>Public service<br>service                                                                           |  |
| 11                   | TFL measurement     | MLQ<br>GTL<br>Raffgriff<br>TLI<br>other                                                                                                                                                                             |  |
| 12                   | TFL measurement     | 0 = MLQ<br>1 = other                                                                                                                                                                                                |  |

|    |                 |                                                                                                                                                                                                                                                |
|----|-----------------|------------------------------------------------------------------------------------------------------------------------------------------------------------------------------------------------------------------------------------------------|
| 13 | TAL measurement | TAL measured<br>No TAL measured<br>Other measure                                                                                                                                                                                               |
| 14 | TAL measured    | 0 = no<br>1 = yes                                                                                                                                                                                                                              |
| 15 | PAL measurement | No PAL measured<br>PAL measured<br>Other measure                                                                                                                                                                                               |
| 16 | PAL measured    | 0 = no<br>1 = yes                                                                                                                                                                                                                              |
| 17 | AV              | amwb = affective-motivational well-being<br>deex = depressed-exhaustive well-being<br>id = irritated-distressed well-being<br>plre = pleased-relaxed well-being<br>sc = psychosomatic complaints                                               |
| 18 | subcategory     | We (work engagement)<br>Depersonalization<br>Burnout<br>Depression<br>Emotional exhaustion<br>Irritation<br>Job stress<br>Negative affect<br>Positive affect<br>Reduced personal accomplishment<br>Somatic complaints<br>Subjective well-being |
| 19 | Variable name   | Name of the outcome variable as indicated in the study                                                                                                                                                                                         |
| 20 | Instrument      | The measurement instrument of the outcome variable                                                                                                                                                                                             |
| 21 | Item number     | The item number of the measurement instrument used for the outcome variable                                                                                                                                                                    |
| 22 | Exclusion       | 0 = no<br>1 = yes                                                                                                                                                                                                                              |
| 23 | Comment         | Place a comment if you like                                                                                                                                                                                                                    |

| STATISTICS   |               |                                                                                                                    |
|--------------|---------------|--------------------------------------------------------------------------------------------------------------------|
| Number       | Variable      | Coding instructions                                                                                                |
| Missing data |               | Type in 999                                                                                                        |
| 14           | Variance      | Use the formula $(1/n-3)$                                                                                          |
| 15           | RelTFL        | Type in the alpha value of TFL                                                                                     |
| 16           | Rel1          | Type in the alpha value of the outcome variable                                                                    |
| 17           | CorrTFL1      | Type in the correlation value of TFL with the outcome variable                                                     |
| 18           | Mind.korr.TFL | Type in the corrected correlation value (Formula: $\text{corr}/(\text{Square root of product of reliabilities})$ ) |

|    |                 |                                                                                                                    |
|----|-----------------|--------------------------------------------------------------------------------------------------------------------|
| 19 | Fisherz.TFL     | Use the Formula in Excel to produce a fisher's Z score                                                             |
| 20 | workc           | Name the work characteristic measured in the study as named in the study                                           |
| 21 | type            | Job demand<br>Personal<br>Task-related<br>Organizational<br>Relational<br>Leadership                               |
| 22 | Workc.cd.hd     | Cd = challenge demand<br>Hd = hindrance demand                                                                     |
| 23 | Alpha.mediator1 | Type in the alpha value of the work characteristic                                                                 |
|    | Cor.uv.workc    | Correlation of TFL with the work characteristic                                                                    |
|    | Mind.korr.UV+M  | Type in the corrected correlation value (Formula: $\text{corr}/(\text{Square root of product of reliabilities})$ ) |
|    | Fisherz.UV+M    | Use the Formula in Excel to produce a fisher's Z score                                                             |
|    | Cor.av.workc    | Correlation of outcome with the work characteristic                                                                |
|    | Mind.korr.AV+M  | Type in the corrected correlation value (Formula: $\text{corr}/(\text{Square root of product of reliabilities})$ ) |
|    | Fisherz.AV+M    | Use the Formula in Excel to produce a fisher's Z score                                                             |
