# Supplementary material for: The Mediating Effects of Work Characteristics on the Relationship between Transformational Leadership and Employee Well-Being: A Meta-Analytic Investigation
Source: MDPI journal article supplement (doi:10.3390/ijerph19053133), 2022-03-07
Supplement: s1 [file s1]

Table S1. Search history.

| Step | Search Medium                                                                                                | Search Terms                                                                                                                                                                                                                                 | Results |
|------|--------------------------------------------------------------------------------------------------------------|----------------------------------------------------------------------------------------------------------------------------------------------------------------------------------------------------------------------------------------------|---------|
| 1.   | <b>Search engines</b>                                                                                        |                                                                                                                                                                                                                                              |         |
|      | PsycInfo                                                                                                     | S1: TI "Transformational leadership"<br>S2: SU "Transformational leadership"<br>S3: S1 OR S2                                                                                                                                                 | 51      |
|      | Psyndex                                                                                                      | S4: AB "well-being" or "wellbeing" or "well being"                                                                                                                                                                                           | 2       |
|      | MEDLINE                                                                                                      | S5: SU "well-being" or "wellbeing" or "well being"                                                                                                                                                                                           | 5       |
|      | PsychArticles                                                                                                | S6: SU "work engagement"                                                                                                                                                                                                                     |         |
|      | EconLit                                                                                                      | S7: S7 TI "work engagement"                                                                                                                                                                                                                  | 1       |
|      | BusinessSourcePremier                                                                                        | S8: TI "flow" or "positive work orientation" or or<br>"emotion based well-being" or "job<br>attitudes" or "feelings towards ones job",<br>"flourishing"                                                                                      | 3       |
|      | AcademicSearchPremier                                                                                        | S9: TI "burnout"                                                                                                                                                                                                                             | 9       |
|      |                                                                                                              | S10: SU "burnout"                                                                                                                                                                                                                            |         |
|      |                                                                                                              | S11: SU "mental health"                                                                                                                                                                                                                      | 8       |
|      |                                                                                                              | S12: TI "mental health"                                                                                                                                                                                                                      |         |
|      |                                                                                                              | S13: S4 OR S5 OR S6 OR S7 OR S8 OR S9 OR S10<br>OR S11 OR S12                                                                                                                                                                                |         |
|      |                                                                                                              | S14: S3 AND S13                                                                                                                                                                                                                              |         |
|      | PsycInfo, Psyndex,<br>MEDLINE, PsychArticles;<br>EconLit;<br>BusinessSourcePremier;<br>AcademicSearchPremier | S1: TI "leadership" instead of "Transformational<br>leadership"                                                                                                                                                                              | 39      |
|      |                                                                                                              | the rest as above; leadership terms and well-being<br>terms separately                                                                                                                                                                       |         |
|      | The Cochrane Library                                                                                         | "Transformational leadership" AND "well-<br>being"; "burnout"; "work engagement";<br>"exhaustion"; "mental health"; "psychological<br>complaints"; and variants of "leadership" and<br>"burnout", "psychological", "well-being",<br>"mental" | 0       |
|      | DigiBib                                                                                                      | "Transformational leadership" AND "well-<br>being"; "burnout"; "work engagement";<br>"exhaustion"; "mental health"; "psychological<br>complaints"; and variants of "leadership" and<br>"burnout", "psychological", "well-being",<br>"mental" | 7       |
|      | PubPsych                                                                                                     | "Transformational leadership" AND "well-<br>being"; "burnout"; "work engagement";<br>"exhaustion"; "mental health"; "psychological<br>complaints"; and variants of "leadership" and<br>"burnout", "psychological", "well-being",<br>"mental" | 3       |
|      | PsychSpider                                                                                                  | "Transformational leadership" AND "well-<br>being"; "burnout"; "work engagement";<br>"exhaustion"; "mental health"; "psychological<br>complaints"; and variants of "leadership" and<br>"burnout", "psychological", "well-being",<br>"mental" | 0       |
|      | Science Direct                                                                                               | "Transformational leadership" AND "well-<br>being"; "burnout"; "work engagement";                                                                                                                                                            | 4       |

Corresponding author: Friederike Teetzen, Department of Work and Organizational Psychology, University of Hamburg, [friederike.teetzen@uni-hamburg.de](mailto:friederike.teetzen@uni-hamburg.de)

|                    |                                                  |                                                                                                                                                                                                                                                                                                                                   |    |
|--------------------|--------------------------------------------------|-----------------------------------------------------------------------------------------------------------------------------------------------------------------------------------------------------------------------------------------------------------------------------------------------------------------------------------|----|
|                    |                                                  | “exhaustion”; “mental health”; “psychological complaints”; and variants of “leadership” and “burnout”, “psychological”, “well-being”, “mental”                                                                                                                                                                                    |    |
| 2.                 | Congress papers                                  |                                                                                                                                                                                                                                                                                                                                   |    |
|                    | EAWOP Abstracts                                  | “Transformational Leadership” and “well-being”                                                                                                                                                                                                                                                                                    | 0  |
|                    | Web of Science                                   | “Transformational Leadership” and “well-being”; “leadership and “burnout”                                                                                                                                                                                                                                                         | 10 |
| 3.                 | Internet search engines                          |                                                                                                                                                                                                                                                                                                                                   |    |
|                    | Google Scholar                                   | “Transformational leadership” AND “well-being”; “burnout”; “work engagement”; “exhaustion”; “mental health”; “psychological complaints”; “flow”; “work orientation”; “calling”; “job attitudes”; “feelings towards ones’ job”; “flourishing”; and variants of “leadership” and “burnout”, “psychological”, “well-being”, “mental” | 34 |
|                    | google.de                                        |                                                                                                                                                                                                                                                                                                                                   | 9  |
| 4.                 | Dissertations                                    |                                                                                                                                                                                                                                                                                                                                   |    |
|                    | German National Library (http://dbf-opac.ddb.de) | “Transformational Leadership” and “well-being”                                                                                                                                                                                                                                                                                    | 0  |
|                    | GVK (Gemeinsamer Verbund Katalog)                | “Transformational leadership” AND “well-being”; “burnout”; “work engagement”; “exhaustion”; “mental health”; “psychological complaints”; and variants of “leadership” and “burnout”, “psychological”, “well-being”, “mental”                                                                                                      | 2  |
|                    | Dissertation Abstracts (ProQuest)                | “Transformational leadership” AND “well-being”; “burnout”; “work engagement”; “exhaustion”; “mental health”; “psychological complaints”; and variants of “leadership” and “burnout”, “psychological”, “well-being”, “mental”                                                                                                      | 13 |
|                    | ABI-Inform                                       | “transformational leadership” + “well-being”                                                                                                                                                                                                                                                                                      | 0  |
| 5.                 | Contacting authors                               |                                                                                                                                                                                                                                                                                                                                   | 8  |
| 6.                 | Scanning relevant reference lists                |                                                                                                                                                                                                                                                                                                                                   | 50 |
| Total: 200 Studies |                                                  |                                                                                                                                                                                                                                                                                                                                   |    |
