# Supplementary material for: The Mediating Effects of Work Characteristics on the Relationship between Transformational Leadership and Employee Well-Being: A Meta-Analytic Investigation
Source: MDPI journal article supplement (doi:10.3390/ijerph19053133), 2022-03-07
Supplement: s1 [file s1]

| Authors, Year            | sample size | country   | economic sector | TFL measure | outcome variable | sub-category | variable name in study          | type of work characteristic | work characteristic name in study                       |
|--------------------------|-------------|-----------|-----------------|-------------|------------------|--------------|---------------------------------|-----------------------------|---------------------------------------------------------|
| Abate et al., 2014       | 528         | Spain     | social service  | MLQ         | PRWB             | prwb         | well-being emotional exhaustion | PERS                        | occupational self-efficacy                              |
| Ali, 2015                | 203         | USA       | NGO             | MLQ         | DEWB             | ee           |                                 | HD                          | role ambiguity                                          |
| Altansukh, 2015          | 337         | Mongolia  | mixed           | TLI         | AMWB             | we           | work engagement                 |                             |                                                         |
| Arfat et al, 2017        | 700         | Pakistan  | finance         | other       | AMWB             | we           | work engagement                 | REL                         | supportive culture                                      |
| Arifin et al., 2014      | 251         | Indonesi  | education       | MLQ         | AMWB             | we           | work engagement                 | ORG                         | organizational culture innovative work behavior         |
| Ariyani & Hidayati, 2018 | 378         | Indonesia | finance         | n/a         | AMWB             | we           | work engagement                 | TASK                        |                                                         |
| Arnold & Walsh, 2015     | 215         | n/a       | industry        | GTL         | PRWB             | prwb         | psych. well-being               | HD                          | customer incivility                                     |
|                          |             |           |                 |             | IDWB             | na           | negative affectivity            | TASK                        | meaning of work                                         |
| Arnold et al., 2007 (1)  | 319         | Canada    | health care     | GTL         | AMWB             | posaff       | pos. aff. well-being            | TASK                        | meaningful work                                         |
| Arnold et al., 2007 (2)  | 146         | Canada    | mixed           | MLQ         | PRWB             | prwb         | psych. well-being               | TASK                        | meaningful work                                         |
| Aryee et al., 2012       | 193         | China     | industry        | MLQ         | AMWB             | we           | work engagement                 | REL                         | LMX (relational)                                        |
|                          |             |           |                 |             |                  |              |                                 |                             | meaningfulness of work                                  |
|                          |             |           |                 |             |                  |              |                                 | TASK                        |                                                         |
| Bae et al., 2013         | 280         | USA       | education       | MLQ         | AMWB             | we           | work engagement                 |                             |                                                         |
| Bamberg et al., 2011     | 1958        | Germany   | mixed           | MLQ         | IDWB             | irri         | irritation                      |                             |                                                         |
| Bass et al., 2016        | 728         | USA       | education       | other       | AMWB             | we           | work egagement                  |                             |                                                         |
|                          |             |           |                 |             | DEWB             | ee           |                                 |                             |                                                         |
| Berger et al., 2019      | 501         | Germany   | industry        | other       | IDWB             | js           | strain                          | REL<br>TASK<br>HD           | team climate for learning<br>autonomy<br>role ambiguity |
| Besieux et al., 2015     | 5313        | Belgium   | finance sector  | MLQ         | AMWB             | we           | work engagement                 |                             |                                                         |
| Boerner et al., 2008     | 142         | Germany   | health care     | other       | IDWB             | js           |                                 | CD                          | stressors                                               |
| Bohorquez, 2016          | 192         | Colombia  | education       | MLQ         | DEWB             | ee           | emotional exhaustion            | ORG                         | organizational commitment                               |
|                          |             |           |                 |             | DEWB             | dep          | depersonalization               |                             |                                                         |

| Authors, Year               | sample size | country     | economic sector | TFL measure | outcome variable | sub-category | variable name in study                                 | type of work characteristic | work characteristic name in study   |
|-----------------------------|-------------|-------------|-----------------|-------------|------------------|--------------|--------------------------------------------------------|-----------------------------|-------------------------------------|
| Bono et al., 2007           | 57          | USA         | health care     | MLQ         | DEWB             | rpa          | personal realization                                   |                             |                                     |
|                             |             |             |                 |             | AMWB             | posaff       | positive affect (happiness, enthusiasm, optimism)      |                             |                                     |
|                             |             |             |                 |             |                  |              | general stress (opposed to momentary due to day level) |                             |                                     |
| Breevaart et al., 2014a     | 61          | Norway      | naval cadets    | MLQ         | IDWB             | js           | negative affect (anxiety, anger irritation)            | REL TASK                    | social support autonomy             |
|                             |             |             |                 |             | IDWB             | js           |                                                        |                             |                                     |
|                             |             |             |                 |             | AMWB             | we           | work engagement                                        |                             |                                     |
| Breevaart et al., 2014b     | 162         | Norway      | navel cadets    | TLI         | AMWB             | we           | work engagement                                        | TASK                        | job resources                       |
| Bright, 2018                | 116         | USA         | industry        | MLQ         | AMWB             | we           | work engagement                                        |                             |                                     |
| Buck, 2018                  | 111         | USA         | NGO             | MLQ         | AMWB             | we           | work engagement                                        |                             |                                     |
| Bui et al., 2017            | 691         | China       | mixed           | MLQ         | AMWB             | we           | work engagement                                        | TASK                        | person-job-fit                      |
| Buil et al., 2016           | 323         | Spain       | industry        | GTL         | AMWB             | we           | work engagement                                        | ORG                         | organizational citizenship behavior |
|                             |             |             |                 |             |                  |              |                                                        | PERS                        | employees                           |
|                             |             |             |                 |             |                  |              |                                                        |                             | organizational identification       |
| Caniels et al., 2018        | 259         | Netherlands | industry        | TLS         | AMWB             | we           | work engagement                                        |                             |                                     |
| Carlstroem & Johanson, 2014 | 48          | Sweden      | industry        | MLQ         | PRWB             | prwb         | positive well-being                                    |                             |                                     |
| Cheng et al., 2016          | 201         | Australia   | health care     | MLQ         | DEWB             | burn         | burnout                                                | REL                         | social identity                     |

| Authors, Year              | sample size | country      | economic sector  | TFL measure | outcome variable             | sub-category           | variable name in study                                                     | type of work characteristic | work characteristic name in study      |
|----------------------------|-------------|--------------|------------------|-------------|------------------------------|------------------------|----------------------------------------------------------------------------|-----------------------------|----------------------------------------|
| Childers, 2019             | 196         | USA          | education        | MLQ         | AMWB<br>DEWB<br>DEWB<br>DEWB | we<br>ee<br>dep<br>rpa | work engagement<br>burnout<br>burnout<br>personal realization              | PERS<br>TASK                | occupational self-efficacy<br>autonomy |
| Chua & Ayoko, 2019         | 155         | Singapore    | industry         | MLQ         | AMWB                         | we                     | work engagement<br>emotional exhaustion                                    | PERS                        | intrinsic motivation                   |
| Cole & Bedeian, 2007       | 828         | USA          | NGO              | MLQ         | DEWB                         | ee                     | emotional exhaustion                                                       |                             |                                        |
| Collier, 2004              | 44          | USA          | health care      | MLQ         | DEWB<br>DEWB<br>DEWB         | ee<br>dep<br>rpa       | emotional exhaustion<br>depersonalization<br>burnout                       |                             |                                        |
| Corrigan et al., 2003      | 620         | USA          | health care      | MLQ         | DEWB<br>DEWB<br>DEWB         | ee<br>burn<br>dep      | emotional exhaustion<br>reduced professional efficacy<br>depersonalization |                             |                                        |
| Daenzer, 2009              | 32          | USA          | industry         | MLQ         | IDWB                         | js                     | job stress                                                                 |                             |                                        |
| Dartey-Baah & Ampofo, 2015 | 196         | Ghana        | financial sector | MLQ         | IDWB                         | js                     |                                                                            |                             |                                        |
| Dibley et al., 2014        | 307         | South Africa | public service   | MLQ         | AMWB                         | we                     | work engagement                                                            |                             |                                        |
| Diebig et al., 2017a       | 292         | Germany      | mixed            | TLI         | DEWB<br>AMWB                 | burn<br>we             | burnout<br>work engagement                                                 | REL                         | team cooperation                       |
| Diebig et al., 2017b       | 205         | Germany      | mixed            | TLI         | IDWB                         | irri                   | stress                                                                     | HD                          | role conflict                          |
| Divya & Suganthi, 2018     | 336         | India        | industry         | TLS         | DEWB                         | burn                   | burnout                                                                    | ORG                         | organizational justice                 |
| Dubinsky et al., 1995      | 174         | USA          | industry         | MLQ         | DEWB<br>IDWB                 | burn<br>js             | burnout<br>job stress                                                      | HD<br>HD                    | role ambiguity<br>role conflict        |



| Authors, Year                          | sample size | country     | economic sector         | TFL measure | outcome variable | sub-category | variable name in study                    | type of work characteristic | work characteristic name in study   |
|----------------------------------------|-------------|-------------|-------------------------|-------------|------------------|--------------|-------------------------------------------|-----------------------------|-------------------------------------|
| Franke & Felfe, 2011 (1)               | 201         | Germany     | industry                | MLQ         | IDWB             | irri         | perceived strain                          | PERS                        | affective organizational commitment |
| Franke & Felfe, 2011 (2)               | 509         | Germany     | mixed                   | MLQ         | IDWB             | irri         | perceived strain                          | PERS                        | affective organizational commitment |
| Franke et al., 2012 (1)                | 136         | Germany     | mixed public service    | MLQ         | IDWB             | irri         | irritation                                |                             |                                     |
| Franke et al., 2012 (2)                | 82          | Germany     | service                 | MLQ         | IDWB             | irri         | irritation                                |                             |                                     |
| Franke et al., 2012 (3)                | 80          | Germany     | mixed                   | MLQ         | IDWB             | irri         | irritation                                |                             |                                     |
| Franke et al., 2012 (4)                | 101         | Germany     | industry                | MLQ         | IDWB             | irri         | irritation                                |                             |                                     |
| Franke et al., 2012 (5)                | 795         | Romania     | mixed                   | MLQ         | IDWB             | irri         | irritation                                |                             |                                     |
| Franke et al., 2012 (6)                | 201         | Germany     | health care             | MLQ         | IDWB             | irri         | irritation                                |                             |                                     |
| Franke et al., 2012 (7)                | 251         | mixed       | industry public service | MLQ         | IDWB             | irri         | irritation                                |                             |                                     |
| Franke et al., 2012 (8)                | 195         | Germany     | service                 | MLQ         | IDWB             | irri         | irritation                                |                             |                                     |
| Franke et al., 2012 (9)                | 154         | Germany     | industry                | MLQ         | IDWB             | irri         | irritation                                |                             |                                     |
| Franke et al., 2014                    | 535         | Germany     | mixed                   | MLQ         | IDWB             | irri         | irritation                                |                             |                                     |
| Freeborough & Patterson, 2015          | 389         | USA         | NGO                     | MLQ         | AMWB             | we           | work engagement                           |                             |                                     |
| Garcia-Rivera et al., 2013             | 102         | Mexico      | health care             | MLQ         | DEWB             | ee           | emotional exhaustion                      |                             |                                     |
| Garcia-Sierra & Fernandez-Castro, 2018 | 131         | Spain       | health care             | MLQ         | AMWB             | we           | work engagement (only vigor + dedication) | ORG                         | structural empowerment              |
| Gautam & Enslin, 2019                  | 191         | Africa      | mixed                   | MLQ         | AMWB             | we           | work engagement                           |                             |                                     |
| Gerards et al., 2018                   | 656         | Netherlands | mixed                   | other       | AMWB             | we           | work engagement                           | ORG                         | access to organizational knowledge  |

| Authors, Year            | sample size | country   | economic sector | TFL measure | outcome variable | sub-category | variable name in study                            | type of work characteristic | work characteristic name in study             |
|--------------------------|-------------|-----------|-----------------|-------------|------------------|--------------|---------------------------------------------------|-----------------------------|-----------------------------------------------|
|                          |             |           |                 |             |                  |              |                                                   | ORG                         | freely accessible and open workplace          |
|                          |             |           |                 |             |                  |              |                                                   | REL                         | social interaction                            |
|                          |             |           |                 |             |                  |              |                                                   | TASK                        | new ways of working facet 1 (autonomy)        |
| Gerick, 2014             | 3018        | Germany   | education       | MLQ         | PRWB             | prwb         | habitual well-being                               | ORG                         | flow of information                           |
|                          |             |           |                 |             | DEWB             | ee           | emotional exhaustion                              | ORG                         | participation                                 |
| Ghadi et al., 2013       | 530         | Australia | mixed public    | GTL         | AMWB             | we           | work engagement                                   | TASK                        | meaning in work                               |
| Ghislieri et al., 2013   | 125         | Italy     | service         | GTL         | AMWB             | we           | work engagement                                   |                             |                                               |
| Gilbert & Kelloway, 2018 | 3132        | USA       | mixed           | GTL         | PRWB             | prwb         | well-being                                        | ORG                         | recognition                                   |
| Gilbert et al., 2017     | 487         | Canada    | mixed           | MLQ         | DEWB             | burn         | burnout                                           | PERS                        | personal resources                            |
| Gill et al., 2006        | 137         | USA       | industry        | other       | DEWB             | ee           | burnout                                           |                             |                                               |
|                          |             |           |                 |             | IDWB             | js           |                                                   |                             |                                               |
| Gill et al., 2010        | 264         | India     | industry        | other       | IDWB             | js           |                                                   |                             |                                               |
| Gillet et al., 2013      | 343         | France    | health care     | GTL         | AMWB             | we           | work engagement                                   | ORG                         | distributive justice                          |
|                          |             |           |                 |             |                  |              |                                                   | ORG                         | interactional justice                         |
|                          |             |           |                 |             |                  |              |                                                   | ORG                         | organizational quality (quality of work life) |
| Gong et al., 2013        | 256         | USA       | education       | MLQ         | DEWB             | rpa          | reduced personal accomplishment                   |                             |                                               |
|                          |             |           |                 |             | DEWB             | ee           | emotional exhaustion                              |                             |                                               |
|                          |             |           |                 |             | DEWB             | dep          | depersonalization                                 |                             |                                               |
|                          |             |           |                 |             |                  |              | positive affect (happiness, enthusiasm, optimism) |                             |                                               |
| Gordick, 2002            | 296         | USA       | mixed           | TLI         | AMWB             | posaff       |                                                   | PERS                        | coping with organizational change             |

| Authors, Year          | sample size | country   | economic sector | TFL measure | outcome variable             | sub-category             | variable name in study                                                                                            | type of work characteristic    | work characteristic name in study                                                                                 |
|------------------------|-------------|-----------|-----------------|-------------|------------------------------|--------------------------|-------------------------------------------------------------------------------------------------------------------|--------------------------------|-------------------------------------------------------------------------------------------------------------------|
| Goswami et al., 2016   | 235         | India     | industry        | TLI         | IDWB<br>IDWB<br>AMWB<br>AMWB | na<br>js<br>posaff<br>we | negative affect (anxiety, anger irritation)<br>perceived stress<br>positive emotions<br>at work<br>work egagement | PERS                           | OCB                                                                                                               |
| Green et al., 2013     | 388         | USA       | health care     | MLQ         | DEWB                         | ee                       | emotional exhaustion                                                                                              |                                |                                                                                                                   |
| Green et al., 2014     | 285         | USA       | health care     | MLQ         | DEWB<br>DEWB<br>DEWB         | ee<br>rpa<br>dep         | emotional exhaustion<br>burnout<br>depersonalization                                                              | HD<br>ORG<br>HD<br>REL<br>TASK | role overload<br>growth/advancement<br>role conflict<br>cooperation<br>role clarity<br>occupational self-efficacy |
| Gregersen et al., 2011 | 461         | Germany   | health care     | MLQ         | DEWB<br>DEWB<br>IDWB         | ee<br>dep<br>irri        | emotional exhaustion<br>depersonalization<br>irritation                                                           | PERS                           |                                                                                                                   |
| Gutierrez, 2014        | 430         | USA       | mixed           | MLQ         | AMWB                         | we                       | work engagement                                                                                                   |                                |                                                                                                                   |
| Hand et al., 2015      | 136         | Australia | education       | MLQ         | IDWB                         | js                       | personal strain/stress                                                                                            | HD<br>HD                       | role overload<br>role conflict<br>organizational commitment<br>organizational identification                      |
| Hansen et al., 2014    | 451         | USA       | industry        | TLS         | AMWB                         | we                       | work engagement                                                                                                   | PERS                           |                                                                                                                   |
| Hartling, 2019         | 278         | USA       | mixed           | MLQ         | IDWB<br>DEWB<br>DEWB<br>IDWB | js<br>dep<br>rpa<br>js   | work tension<br>cynicism<br>professional efficacy<br>stress                                                       | PERS                           |                                                                                                                   |

| Authors, Year                      | sample size | country   | economic sector  | TFL measure | outcome variable     | sub-category           | variable name in study                  | type of work characteristic | work characteristic name in study |
|------------------------------------|-------------|-----------|------------------|-------------|----------------------|------------------------|-----------------------------------------|-----------------------------|-----------------------------------|
| Hawkes et al., 2017                | 277         | Australia | mixed            | TLI         | DEWB<br>AMWB         | ee<br>we               | emotional exhaustion<br>work engagement | ORG<br>TASK                 | recognition influence at work     |
| Hayati et al., 2014                | 240         | Iran      | health care      | MLQ         | AMWB                 | we                     | work engagement                         |                             |                                   |
| Hee et al., 2018                   | 200         | Malaysia  | public service   | MLQ         | AMWB                 | we                     | employee engagement                     |                             |                                   |
| Henkel, 2012                       | 148         | USA       | education        | MLQ         | AMWB                 | we                     | work engagement                         |                             |                                   |
| Hentrich et al., 2016              | 1074        | Germany   | health care      | MLQ         | IDWB                 | irri                   | cognitive irritation                    | HD                          | emotional demands                 |
|                                    |             |           |                  |             | IDWB                 | irri                   | emotional irritation                    | PERS<br>CD                  | occupational self-efficacy        |
| Hetland et al., 2007               | 289         | Norway    | industry         | MLQ         | DEWB                 | dep                    | depersonalization                       |                             | quantitative demands              |
|                                    |             |           |                  |             |                      |                        | reduced professional efficacy           |                             |                                   |
|                                    |             |           |                  |             | DEWB                 | burn                   | emotional exhaustion                    |                             |                                   |
| Hildenbrand et al., 2018           | 148         | Germany   | n/a              | MLQ         | DEWB<br>AMWB<br>IDWB | ee<br>burn<br>we<br>na | burnout<br>thriving<br>negative affect  |                             |                                   |
| Hofslett-Kopperud et al., 2014 (1) | 1226        | Norway    | financial sector | MLQ         | AMWB                 | we                     | work engagement                         | ORG                         | service climate                   |
| Hofslett-Kopperud et al., 2014 (2) | 291         | Norway    | industry         | MLQ         | AMWB                 | we                     | work engagement                         |                             |                                   |
| Holstad et al., 2011 (1)           | 1255        | Germany   | mixed            | GTL         | AMWB<br>IDWB         | we<br>na               | work engagement<br>negative affect      |                             |                                   |
| Holstad et al., 2011 (2)           | 437         | Finland   | mixed            | GTL         | AMWB<br>IDWB         | we<br>na               | work engagement<br>negative affect      |                             |                                   |
| Holstad et al., 2011 (3)           | 552         | Finland   | mixed            | GTL         | AMWB                 | we                     | work engagement                         |                             |                                   |



| Authors, Year                 | sample size | country         | economic sector     | TFL measure | outcome variable | sub-category | variable name in study  | type of work characteristic                                | work characteristic name in study                                                                                                      |
|-------------------------------|-------------|-----------------|---------------------|-------------|------------------|--------------|-------------------------|------------------------------------------------------------|----------------------------------------------------------------------------------------------------------------------------------------|
|                               |             |                 |                     |             | IDWB             | na           | negative affect         |                                                            |                                                                                                                                        |
| Holstad et al., 2013          | 2092        | Germany         | mixed               | GTL         | DEWB             | ee           | emotional exhaustion    | ORG                                                        | procedural fairness                                                                                                                    |
|                               |             |                 | financial           |             | IDWB             | irri         | cognitive irritation    |                                                            |                                                                                                                                        |
| Holstad et al., 2014          | 199         | Germany         | sector              | MLQ         | IDWB             | irri         | emotional irritation    | PERS                                                       | professional ambition                                                                                                                  |
| Holten et al., 2018           | 2947        | Germany         | mixed               | GTL         | PRWB             | prwb         | well-being              |                                                            |                                                                                                                                        |
| Ilyavi, 2019                  | 100         | USA             | education           | MLQ         | DEWB             | dep          | depersonalization       |                                                            |                                                                                                                                        |
|                               |             |                 |                     |             | DEWB             | ee           | emotional exhaustion    |                                                            |                                                                                                                                        |
|                               |             |                 |                     |             | DEWB             | rpa          | personal accomplishment |                                                            |                                                                                                                                        |
| Jacobs et al., 2013           | 315         | Germany         | industry            | TLI         | PRWB             | prwb         | well-being              | HD<br>CD<br>TASK<br>TASK                                   | job demands<br>job demands physical<br>decision latitude<br>decision authority                                                         |
| Jansen in de Wal et al., 2020 | 687         | Netherla<br>nds | education           | other       | AMWB             | we           | engagement in learning  | CD<br>HD<br><br>PERS<br>PERS<br>PERS<br>REL<br>REL<br>TASK | work pressure<br>emotional pressure<br>autonomous<br>motivation<br>competence<br>autonomy<br>relatedness<br>social support<br>autonomy |
| Javeed & Farooqi, 2013        | 152         | Pakistan        | financial<br>sector | GTL         | AMWB             | posaff       | well-being              | TASK<br>TASK<br>ORG                                        | meaningful work<br>influence<br>involvement                                                                                            |

| Authors, Year          | sample size | country | economic sector | TFL measure | outcome variable     | sub-category        | variable name in study                             | type of work characteristic | work characteristic name in study                     |
|------------------------|-------------|---------|-----------------|-------------|----------------------|---------------------|----------------------------------------------------|-----------------------------|-------------------------------------------------------|
| Jena et al., 2018      | 511         | India   | industry        | TLI         | AMWB                 | we<br>depressi      | employee engagement                                | ORG                         | organizational trust                                  |
| Johnston, 2012 (1)     | 187         | Canada  | education       | GTL         | DEWB<br>AMWB         | on<br>posaff        | well-being<br>well-being                           |                             |                                                       |
| Johnston, 2012 (2)     | 915         | Canada  | mixed           | GTL         | PRWB                 | prwb                | mental health                                      |                             |                                                       |
| Jordan, 2016           | 44          | USA     | industry        | MLQ         | AMWB                 | we                  | work engagement<br>reduced personal accomplishment |                             |                                                       |
| Kadian & Ahlawat, 2017 | 400         | India   | n/a             | n/a         | DEWB                 | rpa                 | emotional exhaustion                               | REL                         | social support                                        |
|                        |             |         |                 |             | DEWB<br>DEWB         | ee<br>dep           | depersonalization<br>emotional exhaustion          | PERS                        | empowerment                                           |
| Kanste et al., 2007    | 601         | Finland | health care     | MLQ         | DEWB<br>DEWB         | ee<br>dep           | depersonalization<br>personal accomplishment       |                             |                                                       |
|                        |             |         |                 |             | DEWB                 | rpa                 |                                                    |                             |                                                       |
| Kara et al., 2013      | 443         | Turkey  | service sector  | MLQ         | DEWB                 | burn                | emoloyee burnout                                   | ORG                         | organizational quality                                |
|                        |             |         |                 |             |                      |                     |                                                    | PERS                        | organizational commitment                             |
| Kath et al., 2012      | 470         | USA     | health care     | TLS         | DEWB<br>DEWB<br>AMWB | dep<br>ee<br>posaff | burnout<br>burnout<br>mental health                | TASK<br>REL<br>HD           | job control<br>coworker support<br>role overload      |
|                        |             |         |                 |             | IDWB                 | js                  | perceptions of job stress                          | HD                          | role conflict                                         |
|                        |             |         |                 |             | IDWB<br>DEWB         | js<br>rpa           | perceptions of job stress<br>burnout               | HD<br>TASK<br>CD            | role ambiguity<br>predictability<br>non-participation |

| Authors, Year             | sample size | country | economic sector | TFL measure | outcome variable                                     | sub-category                                 | variable name in study                                                                                                      | type of work characteristic | work characteristic name in study |
|---------------------------|-------------|---------|-----------------|-------------|------------------------------------------------------|----------------------------------------------|-----------------------------------------------------------------------------------------------------------------------------|-----------------------------|-----------------------------------|
| Kath et al., 2013         | 486         | USA     | health care     | TLS         | DEWB<br>DEWB<br>IDWB<br>IDWB<br>IDWB<br>DEWB<br>AMWB | dep<br>ee<br>js<br>js<br>na<br>rpa<br>posaff | burnout<br>burnout<br>perceptions of job stress<br>perceptions of job stress<br>negative affect<br>burnout<br>mental health | HD                          | organizational constraints        |
|                           |             |         |                 |             |                                                      |                                              |                                                                                                                             | HD                          | interpersonal conflict            |
|                           |             |         |                 |             |                                                      |                                              |                                                                                                                             | TASK                        | job control                       |
|                           |             |         |                 |             |                                                      |                                              |                                                                                                                             | HD                          | role overload                     |
|                           |             |         |                 |             |                                                      |                                              |                                                                                                                             | HD                          | role conflict                     |
|                           |             |         |                 |             |                                                      |                                              |                                                                                                                             | HD                          | role ambiguity                    |
|                           |             |         |                 |             |                                                      |                                              |                                                                                                                             | CD                          | non-participation                 |
|                           |             |         |                 |             |                                                      |                                              |                                                                                                                             | HD                          | organizational constraints        |
| Kelloway et al., 2012 (1) | 436         | USA     | industry        | MLQ         | PRWB                                                 | prwb                                         | psychological well-being<br>job related                                                                                     |                             |                                   |
|                           |             |         |                 |             |                                                      |                                              |                                                                                                                             |                             |                                   |
| Kelloway et al., 2012 (2) | 269         | USA     | mixed           | MLQ         | DEWB                                                 | depressi<br>on                               | affective well-being<br>job related                                                                                         |                             |                                   |
|                           |             |         |                 |             |                                                      |                                              |                                                                                                                             |                             |                                   |
|                           |             |         |                 |             | IDWB                                                 | na                                           | affective well-being<br>job related                                                                                         |                             |                                   |
|                           |             |         |                 |             | AMWB                                                 | posaff                                       | affective well-being<br>job related                                                                                         |                             |                                   |
| Kelloway et al., 2013     | 454         | USA     | health care     | TLS         | PRWB<br>AMWB                                         | prwb<br>posaff                               | being<br>mental health                                                                                                      | PERS                        | affective commitment              |

| Authors, Year                   | sample size | country | economic sector | TFL measure | outcome variable | sub-category | variable name in study        | type of work characteristic | work characteristic name in study                |
|---------------------------------|-------------|---------|-----------------|-------------|------------------|--------------|-------------------------------|-----------------------------|--------------------------------------------------|
| Kensbock & Boehm, 2016          | 89          | Israel  | industry        | MLQ         | DEWB             | ee           | emotional exhaustion          | PERS                        | organization-based self-esteem                   |
| Klaic et al., 2018              | 134         | Germany | education       | other       | IDWB             | js           | work-related strain           | PERS                        | need-supplies fit                                |
| Kranabetter & Niessen, 2016 (1) | 206         | n/a     | finance         | MLQ         | DEWB<br>DEWB     | dep<br>ee    | cynicism<br>exhaustion        | PERS                        | HoL (awareness)                                  |
| Kranabetter & Niessen, 2016 (2) | 247         | n/a     | industry        | MLQ         | DEWB<br>DEWB     | dep<br>ee    | cynicism<br>exhaustion        | PERS<br>PERS                | HoL (awareness)<br>HoL (behavior)                |
| Lam & O'Higgins, 2012           | 323         | China   | industry        | MLQ         | IDWB             | js           | job stress                    | PERS                        | organizational commitment - affective commitment |
| Lamade, 2019                    | 194         | USA     | NGO             | MLQ         | AMWB             | we           | work engagement               |                             |                                                  |
| LaRocca et al., 2018            | 130         | USA     | veterans        | MLQ         | DEWB             | on           | depression                    |                             |                                                  |
| Laukamp, 2008                   | 309         | Germany | industry        | MLQ         | IDWB             | js           |                               |                             |                                                  |
| Lee & Cummings, 2008            | 172         | USA     | health care     | other       | DEWB             | dep          | depersonalization             | TASK                        | managable workload                               |
|                                 |             |         |                 |             | DEWB             | ee           | emotional exhaustion          | ORG                         | reward                                           |
|                                 |             |         |                 |             | DEWB             | burn         | reduced professional efficacy | ORG                         | fairness values                                  |
|                                 |             |         |                 |             |                  |              |                               | ORG                         | (meaningfulness/organizaional commitment)        |
|                                 |             |         |                 |             |                  |              |                               | REL                         | community control                                |
| Lee et al., 2019                | 500         | China   | mixed           | TLI         | AMWB             | we           | work engagement               | TASK<br>ORG                 | performance feedback                             |
| Lewis & Cunningham, 2016        | 120         | USA     | health care     | TLS         | DEWB             | ee           | emotional exhaustion          | TASK                        | managable workload                               |

| Authors, Year           | sample size | country | economic sector | TFL measure | outcome variable | sub-category | variable name in study | type of work characteristic | work characteristic name in study |
|-------------------------|-------------|---------|-----------------|-------------|------------------|--------------|------------------------|-----------------------------|-----------------------------------|
|                         |             |         |                 |             | AMWB             | we           | work engagement        | ORG                         | fairness                          |
|                         |             |         |                 |             |                  |              |                        | REL                         | community                         |
|                         |             |         |                 |             |                  |              |                        | TASK                        | control                           |
|                         |             |         |                 |             |                  |              |                        | TASK                        | reward                            |
| Li et al., 2019         | 281         | China   | industry        | MLQ         | AMWB             | we           | work engagement        | PERS                        | empowerment                       |
|                         |             |         |                 |             |                  |              |                        |                             | innovative work                   |
|                         |             |         |                 |             |                  |              |                        | PERS                        | behavior                          |
| Li, 2019                | 558         | China   | industry        | MLQ         | AMWB             | we           | work engagement        | PERS                        | psychological capital             |
|                         |             |         |                 |             |                  |              |                        |                             | employee voice                    |
|                         |             |         |                 |             |                  |              |                        |                             | behavior                          |
| Liang et al., 2017      | 211         | China   | industry        | MLQ         | AMWB             | we           | work engagement        | PERS                        |                                   |
| Lin et al, 2015         | 651         | China   | health care     | MLQ         | PRWB             | prwb         | general health         |                             |                                   |
| Lin et al., 2019        | 130         | USA     | mixed           | MLQ         | AMWB             | posaff       | positive affect        | PERS                        | OCB                               |
|                         |             |         |                 |             |                  |              | emotional              |                             |                                   |
|                         |             |         |                 |             | DEWB             | ee           | exhaustion             |                             |                                   |
| Liu et al., 2010        | 745         | China   | mixed           | other       | IDWB             | js           | stress symptoms        | jd                          | work stress                       |
|                         |             |         | public          |             |                  |              | occupational           |                             | psychological                     |
| Liu et al., 2019        | 385         | China   | service         | MLQ         | DEWB             | ee           | burnout                | PERS                        | empowerment                       |
|                         |             |         |                 |             |                  |              | occupational           |                             |                                   |
|                         |             |         |                 |             | DEWB             | dep          | burnout                |                             |                                   |
|                         |             |         |                 |             |                  |              | occupational           |                             |                                   |
|                         |             |         |                 |             | DEWB             | rpa          | burnout                |                             |                                   |
| Liu, 2012               | 107         | USA     | health care     | MLQ         | AMWB             | we           | job engagement         |                             |                                   |
|                         |             |         |                 |             |                  |              | emotional              |                             |                                   |
| Lozano-Chapa, 2017      | 109         | USA     | education       | MLQ         | DEWB             | ee           | exhaustion             |                             |                                   |
|                         |             |         |                 |             |                  |              | emotional              |                             |                                   |
| Madathil et al., 2014   | 89          | USA     | health care     | MLQ         | DEWB             | ee           | exhaustion             | TASK                        | autonomy                          |
|                         |             |         |                 |             |                  |              | personal               |                             |                                   |
|                         |             |         |                 |             | DEWB             | rpa          | accomplishment         |                             |                                   |
|                         |             |         |                 |             | DEWB             | dep          | depersonalization      |                             |                                   |
|                         |             |         |                 |             |                  | depressi     | depressive             |                             |                                   |
| Malloy & Penprase, 2010 | 122         | USA     | health care     | MLQ         | DEWB             | on           | symptoms               | HD                          | role conflict                     |

| Authors, Year           | sample size | country   | economic sector | TFL measure | outcome variable | sub-category | variable name in study          | type of work characteristic | work characteristic name in study |
|-------------------------|-------------|-----------|-----------------|-------------|------------------|--------------|---------------------------------|-----------------------------|-----------------------------------|
|                         |             |           |                 |             | IDWB             | js           | behavioral and cognitive stress | CD                          | work demands                      |
|                         |             |           |                 |             | DEWB             | burn         | burnout                         | CD                          | quantitative demands              |
|                         |             |           |                 |             |                  |              |                                 | CD                          | cognitive demands                 |
|                         |             |           |                 |             |                  |              |                                 | HD                          | emotional demands                 |
|                         |             |           |                 |             |                  |              |                                 |                             | hiding emotion                    |
|                         |             |           |                 |             |                  |              |                                 | HD                          | demands                           |
|                         |             |           |                 |             |                  |              |                                 |                             | occupational self-                |
|                         |             |           |                 |             |                  |              |                                 | PERS                        | efficacy                          |
|                         |             |           |                 |             |                  |              |                                 |                             | social support                    |
|                         |             |           |                 |             |                  |              |                                 | REL                         | (colleagues)                      |
|                         |             |           |                 |             |                  |              |                                 | TASK                        | role clarity                      |
|                         |             |           |                 |             |                  |              |                                 | TASK                        | influence over work               |
|                         |             |           |                 |             |                  |              |                                 |                             | development                       |
| Maricle, 2013           | 70          | USA       | Education       | MLQ         | DEWB             | ee           |                                 |                             | possibilities (work)              |
| Mauno, 2016             | 3466        | Finland   | health care     | GTL         | AMWB             | we           | work engagement                 | HD                          | variation of work                 |
| Mayr, 2017              | 213         | Germany   | NGO             | MLQ         | AMWB             | we           | work engagement                 |                             | commitment                        |
| Mazzetti et al., 2019   | 358         | Italy     | industry        | MLQ         | AMWB             | we           | work engagement                 | PERS                        | meaning of work                   |
|                         |             |           |                 |             | PRWB             | prwb         | general health                  |                             |                                   |
| McKee et al., 2011      | 178         | Canada    | health care     | MLQ         | PRWB             | prwb         | mental well-being               | REL                         | hardiness                         |
|                         |             |           |                 |             |                  |              |                                 | TASK                        | sense of community                |
|                         |             |           |                 |             |                  |              |                                 |                             | meaningful work                   |
| Mehari, 2015            | 82          | Sweden    | health care     | GTL         | PRWB             | prwb         | well-being                      | TASK                        | meaningful work                   |
|                         |             |           |                 |             |                  |              |                                 |                             | structural                        |
| Monje Amor et al., 2020 | 240         | Spain     | industry        | TLS         | AMWB             | we           | work engagement                 | ORG                         | empowerment                       |
| Moss, 2009              | 160         | Australia | mixed           | TLS         | AMWB             | we           | dedication                      | PERS                        | self-esteem                       |
|                         |             |           |                 |             | AMWB             | we           | vigor                           |                             |                                   |

| Authors, Year              | sample size | country           | economic sector | TFL measure | outcome variable | sub-category | variable name in study   | type of work characteristic | work characteristic name in study |
|----------------------------|-------------|-------------------|-----------------|-------------|------------------|--------------|--------------------------|-----------------------------|-----------------------------------|
| Mostafa, 2019              | 229         | Great Britain     | service sector  | TLI         | AMWB             | we           | work engagement          | ORG                         | organizational social capital     |
| Munir et al., 2010         | 447         | Denmark           | health care     | GTL         | AMWB             | posaff       | well-being               | ORG                         | involvement                       |
|                            |             |                   |                 |             | DEWB             | depression   | depressive symptoms      | PERS TASK                   | occupational self-efficacy        |
|                            |             |                   |                 |             |                  |              |                          | TASK                        | role clarity                      |
|                            |             |                   |                 |             |                  |              |                          | TASK                        | opportunities for development     |
|                            |             |                   |                 |             |                  |              |                          | TASK                        | influence                         |
|                            |             |                   |                 |             |                  |              |                          | TASK                        | meaningful work                   |
| Nelson & Shraim, 2014      | 231         | Kuwait            | service sector  | MLQ         | AMWB             | we           | work engagement          |                             |                                   |
| Nielsen & Daniels, 2012    | 425         | Denmark           | mixed           | GTL         | AMWB             | we           | vitality                 | jd                          | role conflict                     |
|                            |             |                   |                 |             | DEWB             | burn         | burnout                  | REL                         | social support                    |
|                            |             |                   |                 |             |                  |              |                          | REL                         | cohesion                          |
|                            |             |                   |                 |             |                  |              |                          | TASK                        | meaningful work                   |
| Niessen et al., 2017       | 200         | Germany           | education       | MLQ         | AMWB             | we           | thriving                 | PERS                        | proactivity                       |
|                            |             |                   |                 |             | DEWB             | ee           | emotional exhaustion     |                             |                                   |
| Odink, 2014                | 191         | mixed             | mixed           | other       | AMWB             | we           | happiness (work related) | REL                         | relationships                     |
|                            |             |                   |                 |             | AMWB             | we           | health                   |                             |                                   |
| Othman, 2017               | 112         | Malaysia          | n/a             | other       | AMWB             | we           | work engagement          |                             |                                   |
| Parveen & Adeinat, 2019    | 250         | Saudi Arabia      | finance sector  | MLQ         | DEWB             | burn         | burnout                  |                             |                                   |
|                            |             |                   |                 |             | IDWB             | js           | work stress              |                             |                                   |
| Peng & Tseng, 2019         | 234         | China             | health care     | MLQ         | AMWB             | we           | work engagement          |                             |                                   |
| Perilla Toro & Ortiz, 2017 | 597         | Columbia , Mexico | mixed           | MLQ         | AMWB             | posaff       | positive affect          | PERS                        | occupational self-efficacy        |

| Authors, Year               | sample size | country        | economic sector         | TFL measure | outcome variable     | sub-category                 | variable name in study                                                             | type of work characteristic | work characteristic name in study                              |
|-----------------------------|-------------|----------------|-------------------------|-------------|----------------------|------------------------------|------------------------------------------------------------------------------------|-----------------------------|----------------------------------------------------------------|
| Perko et al., 2014          | 557         | Finland        | public sector           | GTL         | PRWB<br>IDWB<br>DEWB | prwb<br>na<br>depressi<br>on | symptoms of discomfort<br>negative affect<br>depression<br>work-related rumination | PERS<br>TASK                | occupational self-efficacy<br>meaningfulness of work           |
| Perko et al., 2016          | 262         | Finland        | public sector           | GTL         | AMWB<br>DEWB         | we<br>ee                     | vigor<br>emotional exhaustion                                                      |                             |                                                                |
| Prochazka et al., 2017      | 307         | Czech Republic | mixed Service sector    | other       | AMWB                 | we                           | work engagement                                                                    | PERS                        | occupational self-efficacy                                     |
| Reddy & Mehta, 2019         | 150         | India          | sector                  | MLQ         | DEWB                 | burn                         | burnout<br>emotional exhaustion                                                    |                             |                                                                |
| Rittschof & Fortunato, 2016 | 197         | USA            | mixed                   | MLQ         | DEWB                 | ee                           | personal accomplishment<br>depersonalization<br>chronic stress                     | PERS                        | affective commitment                                           |
| Rowold & Heinitz, 2008 (1)  | 101         | Germany        | industry public service | MLQ         | DEWB<br>IDWB         | rpa<br>dep<br>js             |                                                                                    |                             |                                                                |
| Rowold & Heinitz, 2008 (2)  | 1311        | Germany        | public service          | MLQ         | IDWB                 | js                           | work-related stress<br>emotional exhaustion                                        |                             |                                                                |
| Russell et al., 2014        | 379         | USA            | public service          | TLI         | DEWB<br>DEWB         | ee<br>dep                    | depersonalization<br>reduced personal accomplishment                               | HD                          | stressors                                                      |
| Sahin et al., 2014          | 365         |                | mixed                   | MLQ         | DEWB<br>AMWB         | rpa<br>we                    | work engagement                                                                    | ORG<br>PERS<br>TASK         | organizational support<br>psychological capital<br>job control |



| Authors, Year         | sample size | country | economic sector | TFL measure | outcome variable | sub-category | variable name in study | type of work characteristic | work characteristic name in study |
|-----------------------|-------------|---------|-----------------|-------------|------------------|--------------|------------------------|-----------------------------|-----------------------------------|
|                       |             |         |                 |             |                  |              |                        | TASK                        | job clarity                       |
|                       |             |         |                 |             |                  |              |                        | TASK                        | job competency                    |
| Sahu et al., 2018     | 405         | India   | industry        | MLQ         | AMWB             | we           | employee engagement    | ORG                         | employer branding                 |
|                       |             |         |                 |             |                  |              |                        |                             | occupational self-efficacy        |
| Salanova et al., 2011 | 280         | Spain   | health care     | MLQ         | AMWB             | we           | vigour                 | PERS                        |                                   |
|                       |             |         |                 |             | AMWB             | we           | dedication             |                             |                                   |
| Salanova et al., 2014 | 702         | Spain   | mixed           | TLI         | DEWB             | dep          | cynicism               | CD                          | quantitative overload             |
|                       |             |         |                 |             | IDWB             | js           | anxiety                | jd                          | role ambiguity                    |
|                       |             |         |                 |             |                  | depressi     |                        |                             |                                   |
|                       |             |         |                 |             | DEWB             | on           | boredom                | jd                          | role conflict                     |
|                       |             |         |                 |             | AMWB             | we           | pleasure               | jd                          | monotony                          |
|                       |             |         |                 |             | DEWB             | ee           | fatigue                | jd                          | emotional overload                |
|                       |             |         |                 |             |                  |              | professional           |                             |                                   |
|                       |             |         |                 |             | DEWB             | rpa          | competence             | jd                          | mental overload                   |
|                       |             |         |                 |             | AMWB             | we           | dedication             | jd                          | mobbing                           |
|                       |             |         |                 |             | AMWB             | we           | vigor                  | jd                          | emotional competences             |
|                       |             |         |                 |             |                  |              |                        |                             | organizational                    |
|                       |             |         |                 |             | AMWB             | we           | absorption             | ORG                         | commitment                        |
|                       |             |         |                 |             |                  |              |                        |                             | occupational self-efficacy        |
|                       |             |         |                 |             |                  |              |                        | PERS                        |                                   |
|                       |             |         |                 |             |                  |              |                        | PERS                        | intrinsic interest                |
|                       |             |         |                 |             |                  |              |                        |                             | inefficacy beliefs                |
|                       |             |         |                 |             |                  |              |                        | PERS                        | (recoded)                         |
|                       |             |         |                 |             |                  |              |                        | REL                         | teamwork                          |
|                       |             |         |                 |             |                  |              |                        | TASK                        | control                           |
| Salem, 2015           | 327         | Egypt   | service sector  | MLQ         | DEWB             | burn         | burnout                |                             |                                   |
|                       |             |         |                 |             | IDWB             | js           | job stress             |                             |                                   |

| Authors, Year             | sample size | country     | economic sector | TFL measure | outcome variable     | sub-category       | variable name in study                    | type of work characteristic               | work characteristic name in study                                       |
|---------------------------|-------------|-------------|-----------------|-------------|----------------------|--------------------|-------------------------------------------|-------------------------------------------|-------------------------------------------------------------------------|
| Schmitt et al., 2016      | 148         | Netherlands | mixed           | other       | IDWB<br>AMWB         | js<br>we           | job strain<br>work engagement             | PERS                                      | personal initiative                                                     |
| Seltzer et al., 1989      | 277         | USA         | MBA students    | MLQ         | DEWB<br>IDWB         | burn<br>js         | burnout<br>job stress                     |                                           |                                                                         |
| Sharma & Krishnan, 2012   | 93          | India       | mixed           | other       | AMWB                 | we                 | work engagement                           |                                           |                                                                         |
| Shi et al., 2014          | 378         | China       | health care     | TLI         | DEWB                 | dep                | cynicism<br>emotional exhaustion          |                                           |                                                                         |
| Shokory & Suradi, 2018    | 195         | Malaysia    | mixed           | MLQ         | DEWB<br>AMWB         | ee<br>we           | work engagement<br>psychological distress |                                           |                                                                         |
| Skogstad et al., 2007     | 2273        | Norway      | mixed           |             | IDWB                 | js                 |                                           | HD                                        | role conflict<br>conflicts with coworkers<br>bullying<br>role ambiguity |
| Smith, 2012               | 142         | USA         | health care     | TLS         | DEWB<br>DEWB<br>AMWB | burn<br>burn<br>we | burnout<br>burnout<br>work engagement     | TASK<br>REL<br>TASK<br>TASK<br>ORG<br>ORG | workload<br>community<br>reward<br>control<br>fairness<br>values        |
| Song et al., 2012         | 432         | Korea       | mixed financial | MLQ         | AMWB                 | we                 | work engagement                           |                                           |                                                                         |
| Soo & Ali, 2013           | 474         | Malaysia    | sector          | MLQ         | IDWB<br>IDWB         | js<br>js           | emotional stress<br>psychological stress  |                                           |                                                                         |
| Stein et al., 2019        | 356         | Germany     | education       | GTL         | IDWB                 | irri               | irritation                                |                                           |                                                                         |
| Stenling & Tafvelin, 2014 | 184         | Sweden      | athletes        | other       | AMWB                 | posaff             | well-being                                | PERS                                      | need satisfaction                                                       |

| Authors, Year                | sample size | country     | economic sector       | TFL measure | outcome variable | sub-category | variable name in study | type of work characteristic | work characteristic name in study                                          |
|------------------------------|-------------|-------------|-----------------------|-------------|------------------|--------------|------------------------|-----------------------------|----------------------------------------------------------------------------|
| Stordeur et al., 2001        | 625         | Belgium     | health care           | MLQ         | DEWB             | ee           | emotional exhaustion   | HD<br>HD<br>CD<br>HD        | role ambiguity<br>role conflict<br>workload<br>social environment          |
| Strom et al., 2014           | 348         | USA         | industry              | MLQ         | AMWB             | we           | work engagement        | ORG<br>ORG                  | procedural justice<br>distributive justice                                 |
| Syrek et al., 2013           | 262         | Germany     | industry              | TLS         | DEWB             | ee           | emotional exhaustion   | CD                          | time pressure                                                              |
| Tafvelin et al., 2011        | 101         | Sweden      | social service public | MLQ         | AMWB             | posaff       | affective well-being   | ORG                         | climate for innovation                                                     |
| Tafvelin et al., 2019        | 217         | Sweden      | service               | GTL         | DEWB             | burn         | burnout                |                             |                                                                            |
| Taylor, 2014                 | 78          | USA         | education service     | MLQ         | AMWB             | we           | work engagement        |                             |                                                                            |
| Teare, 2006                  | 147         | USA         | sector                | other       | IDWB<br>DEWB     | js<br>burn   | job stress<br>burnout  |                             |                                                                            |
| Tims et al., 2011            | 45          | Netherlands | industry              | MLQ         | AMWB             | we           | work engagement        |                             |                                                                            |
| Tsai et al., 2009            | 282         | Taiwan      | industry              | MLQ         | AMWB             | posaff       | positive moods         |                             |                                                                            |
| van Dick et al., 2018        | 5290        | mixed       | mixed                 | GTL         | DEWB             | burn         | burnout                | PERS<br>REL<br>PERS         | innovative work behavior<br>team identification<br>OCB                     |
| van Dierendonck et al., 2014 | 200         | Netherlands | education             | TLS         | AMWB             | we           | work engagement        | jd<br>PERS<br><br>PERS      | job uncertainty<br>affective commitment<br>psychological need satisfaction |
| Velkova, 2011                | 71          | USA         | industry              | MLQ         | PRWB             | prwb         | well-being             |                             |                                                                            |

| Authors, Year                | sample size | country      | economic sector | TFL measure                     | outcome variable | sub-category | variable name in study   | type of work characteristic | work characteristic name in study  |
|------------------------------|-------------|--------------|-----------------|---------------------------------|------------------|--------------|--------------------------|-----------------------------|------------------------------------|
| Verbraak, 2014               | 119         | mixed        | mixed           | other                           | AMWB             | we           | psychological well-being |                             |                                    |
|                              |             |              |                 |                                 | AMWB             | we           | physical well-being      |                             |                                    |
|                              |             |              |                 |                                 | DEWB             | ee           | burnout                  |                             |                                    |
|                              |             |              |                 | individualized consideration of |                  |              |                          |                             |                                    |
| Vignoli et al., 2018         | 492         | Italy        | industry        | MLQ                             | AMWB             | we           | work engagement          | REL                         | social support (social well-being) |
|                              |             |              |                 |                                 | PRWB             | prwb         | general health           | HD                          | conflict with colleagues           |
|                              |             |              |                 |                                 |                  |              |                          |                             | perceived                          |
| Vila-Vázquez et al., 2018    | 320         | Spain        | industry        | GTL                             | AMWB             | we           | work engagement          | ORG                         | organizational support             |
|                              |             |              |                 |                                 |                  |              |                          | PERS                        | core self-evaluations              |
| Vincent-Hoeper, 2013         | 134         | South Africa | mixed           | GTL                             | DEWB             | ee           | emotional exhaustion     | CD                          | quantitative demands               |
|                              |             |              |                 |                                 |                  |              | affective well-being     |                             |                                    |
| Vincent-Hoeper, 2013         | 618         | Germany      | health care     |                                 | PRWB             | prwb         |                          | TASK                        | predictability                     |
| Vincent-Hoeper et al., 2012  | 1132        | Germany      | mixed           | MLQ                             | AMWB             | we           | work engagement          | HD                          | role conflict                      |
| Vincent-Hoeper et al., 2017a | 582         | Germany      | health care     | MLQ                             | IDWB             | irri         | irritation               | HD                          | hide emotions                      |
|                              |             |              |                 |                                 | DEWB             | dep          | depersonalization        | HD                          | job insecurity                     |
|                              |             |              |                 |                                 |                  |              | emotional exhaustion     |                             |                                    |
|                              |             |              |                 |                                 | DEWB             | ee           | psychological well-being | TASK                        | role clarity                       |
|                              |             |              |                 |                                 | PRWB             | prwb         |                          | ORG                         | influence at work                  |
|                              |             |              |                 |                                 |                  |              |                          |                             | closeness to                       |
|                              |             |              |                 |                                 |                  |              |                          | ORG                         | organization                       |
|                              |             |              |                 |                                 |                  |              |                          |                             | social support                     |
|                              |             |              |                 |                                 |                  |              |                          | REL                         | colleagues                         |
|                              |             |              |                 |                                 |                  |              |                          | REL                         | feelings of community              |
|                              |             |              |                 |                                 |                  |              |                          | TASK                        | freedom of action                  |

| Authors, Year                   | sample size | country | economic sector | TFL measure | outcome variable             | sub-category               | variable name in study                                         | type of work characteristic | work characteristic name in study |
|---------------------------------|-------------|---------|-----------------|-------------|------------------------------|----------------------------|----------------------------------------------------------------|-----------------------------|-----------------------------------|
| Vincent-Hoeper et al., 2017b    | 1639        | Germany | mixed           | MLQ         | IDWB                         | irri                       | irritation<br>emotional<br>exhaustion<br>positive well-being   | TASK                        | possibilities for development     |
|                                 |             |         |                 |             |                              |                            |                                                                | TASK                        | meaning of work                   |
|                                 |             |         |                 |             |                              |                            |                                                                | CD                          | qualitative overload              |
|                                 |             |         |                 |             |                              |                            |                                                                | CD                          | time pressure                     |
|                                 |             |         |                 |             |                              |                            |                                                                | HD                          | social stressors                  |
|                                 |             |         |                 |             |                              |                            |                                                                | HD                          | insecurity                        |
|                                 |             |         |                 |             |                              |                            |                                                                | HD                          | insufficient challenge            |
|                                 |             |         |                 |             |                              |                            |                                                                | PERS                        | occupational self-efficacy        |
| Vincent-Hoeper et al., 2018     | 412         | Germany | health care     | GTL         | IDWB                         | irri                       | irritation<br>emotional<br>exhaustion<br>subjective well-being | TASK                        | possibilities to present          |
|                                 |             |         |                 |             |                              |                            |                                                                | TASK                        | freedom of action                 |
|                                 |             |         |                 |             |                              |                            |                                                                | TASK                        | development                       |
|                                 |             |         |                 |             |                              |                            |                                                                | TASK                        | possibilities                     |
|                                 |             |         |                 |             |                              |                            |                                                                |                             |                                   |
|                                 |             |         |                 |             |                              |                            |                                                                |                             |                                   |
|                                 |             |         |                 |             |                              |                            |                                                                |                             |                                   |
|                                 |             |         |                 |             |                              |                            |                                                                |                             |                                   |
| Vincent-Hoeper et al., 2019 (1) | 386         | Germany | industry        | MLQ         | DEWB<br>AMWB<br>IDWB         | ee<br>posaff<br>irri       | emotional<br>exhaustion<br>positive well-being<br>irritation   | PERS                        | occupational self-efficacy        |
| Vincent-Hoeper et al., 2019 (2) | 306         | USA     | industry        | MLQ         | DEWB<br>IDWB<br>AMWB<br>AMWB | ee<br>irri<br>posaff<br>we | irritation<br>positive well-being<br>work engagement           | PERS                        | occupational self-efficacy        |

| Authors, Year               | sample size | country | economic sector | TFL measure | outcome variable | sub-category | variable name in study           | type of work characteristic | work characteristic name in study |
|-----------------------------|-------------|---------|-----------------|-------------|------------------|--------------|----------------------------------|-----------------------------|-----------------------------------|
| Vincent-Hoeper et al., 2020 | 2015        | Germany | mixed           | GTL         | AMWB             | we           | work engagement                  | CD                          | quantitative demands              |
|                             |             |         |                 |             | DEWB             | ee           | emotional exhaustion             | CD                          | qualitative overexertion          |
|                             |             |         |                 |             | DEWB             | ee           | need for recovery                | HD                          | illgitimate tasks                 |
|                             |             |         |                 |             | IDWB             | irri         | emotional irritation             | HD                          | uncertainty about the job         |
|                             |             |         |                 |             | IDWB             | irri         | cognitive irritation             | lead                        | social support leader             |
|                             |             |         |                 |             | PRWB             | prwb         | psychologcial well-being         | ORG                         | perceived organizational support  |
|                             |             |         |                 |             |                  |              |                                  |                             | need for personal                 |
|                             |             |         |                 |             |                  |              |                                  | PERS                        | development                       |
|                             |             |         |                 |             |                  |              |                                  | PERS                        | occupational ambition             |
|                             |             |         |                 |             |                  |              |                                  | PERS                        | hope for success                  |
|                             |             |         |                 |             |                  |              |                                  | PERS                        | coping self-efficacy              |
|                             |             |         |                 |             |                  |              |                                  |                             | increasing structural             |
|                             |             |         |                 |             |                  |              |                                  | PERS                        | resources                         |
|                             |             |         |                 |             |                  |              |                                  | PERS                        | supervisor crafting               |
|                             |             |         |                 |             |                  |              |                                  |                             | social support                    |
|                             |             |         |                 |             |                  |              |                                  | REL                         | colleagues                        |
|                             |             |         |                 |             |                  |              |                                  |                             | possibilites for                  |
|                             |             |         |                 |             |                  |              |                                  | TASK                        | development                       |
|                             |             |         |                 |             |                  |              |                                  | TASK                        | role clarity                      |
| Walsh & Arnold, 2020        | 246         | n/a     | mixed           | MLQ         | IDWB             | na           | negative affect                  |                             |                                   |
|                             |             |         |                 |             | AMWB             | we           | psychological well-being (vigor) |                             |                                   |
| Walsh et al., 2014          | 254         | USA     | mixed           | MLQ         | PRWB             | prwb         | psychological health             |                             |                                   |
|                             |             |         |                 |             |                  |              |                                  | ORG                         | procedural justice                |
|                             |             |         |                 |             |                  |              |                                  | PERS                        | psychological empowerment         |

| Authors, Year         | sample size | country | economic sector | TFL measure | outcome variable             | sub-category             | variable name in study                                     | type of work characteristic | work characteristic name in study   |
|-----------------------|-------------|---------|-----------------|-------------|------------------------------|--------------------------|------------------------------------------------------------|-----------------------------|-------------------------------------|
| Wang et al., 2017     | 422         | Taiwan  | industry        | TLI         | AMWB<br>AMWB                 | posaff<br>we             | positive affect<br>work engagement                         | PERS                        | resilience                          |
| Wefald et al., 2011   | 382         | USA     | industry        | GTL         | AMWB                         | we                       | work engagement                                            | PERS                        | affective organizational commitment |
|                       |             |         |                 |             | AMWB<br>AMWB                 | we<br>we                 | work engagement<br>vigor                                   | ORG                         | perceived organizational support    |
|                       |             |         |                 |             | AMWB                         | posaff                   | positive affect                                            |                             | goal orientation                    |
| Whitford & Moss, 2009 | 165         | mixed   | mixed           | TLS         | AMWB                         | we                       | work engagement                                            | PERS                        | learning                            |
| Widmann, 2013         | 224         | USA     | industry        | MLQ         | AMWB                         | we                       | work engagement                                            |                             |                                     |
| Wolf et al., 2007a    | 545         | Germany | mixed           | MLQ         | DEWB<br>PRWB                 | ee<br>prwb               | emotional exhaustion<br>well-being                         |                             |                                     |
| Wolf et al., 2007b    | 390         | Germany | mixed           | MLQ         | DEWB<br>PRWB<br>DEWB<br>DEWB | ee<br>prwb<br>rpa<br>dep | emotional exhaustion<br>well-being<br>burnout<br>cynicism  |                             |                                     |
| Wolf et al., 2007c    | 76          | Germany | mixed           | MLQ         | DEWB<br>PRWB                 | ee<br>prwb               | emotional exhaustion<br>well-being                         |                             |                                     |
| Wolf et al., 2009a    | 29          | Germany | mixed           | MLQ         | DEWB<br>DEWB<br>PRWB         | ee<br>ee<br>prwb         | emotional exhaustion<br>inability to recover<br>well-being |                             |                                     |
| Wolf et al., 2009b    | 25          | Germany | mixed           | MLQ         | DEWB<br>PRWB                 | ee<br>prwb               | emotional exhaustion<br>well-being                         |                             |                                     |
| Wolf et al., 2010     | 417         | Germany | mixed           | MLQ         | PRWB                         | prwb                     | well-being                                                 |                             |                                     |

| Authors, Year        | sample size | country      | economic sector | TFL measure | outcome variable             | sub-category             | variable name in study                                    | type of work characteristic | work characteristic name in study                                    |
|----------------------|-------------|--------------|-----------------|-------------|------------------------------|--------------------------|-----------------------------------------------------------|-----------------------------|----------------------------------------------------------------------|
|                      |             |              |                 |             | DEWB                         | ee                       | emotional exhaustion                                      |                             |                                                                      |
| Wolf et al., 2011a   | 279         | Germany      | mixed           | MLQ         | DEWB<br>PRWB                 | ee<br>prwb               | emotional exhaustion<br>well-being                        |                             |                                                                      |
| Wolf et al., 2011b   | 42          | Germany      | mixed           | MLQ         | DEWB<br>PRWB<br>DEWB<br>DEWB | ee<br>prwb<br>dep<br>rpa | emotional exhaustion<br>well-being<br>cynicism<br>burnout |                             |                                                                      |
| Wolf, 2012           | 100         | Germany      | mixed           | MLQ         | DEWB<br>DEWB<br>DEWB<br>PRWB | ee<br>dep<br>rpa<br>prwb | emotional exhaustion<br>cynicism<br>burnout<br>well-being |                             |                                                                      |
| Wolfram & Mohr, 2009 | 403         | Germany      | industry        | MLQ         | IDWB                         | irri                     | emotional irritation                                      | PERS<br><br>TASK            | occupational self-efficacy<br>subjective meaning of work             |
| Wu et al., 2019      | 391         | China        | health care     | MLQ         | DEWB                         | ee                       | emotional exhaustion                                      |                             |                                                                      |
| Yao et al., 2014     | 347         | China        | mixed           | MLQ         | IDWB                         | js                       | work stress                                               | PERS                        | deviant negative behavior (recoded)                                  |
| Young et al., 2012   | 180         | South Korea  | health care     | MLQ         | IDWB                         | js                       | job stress                                                |                             |                                                                      |
| Zhang et al., 2014   | 339         | China        | mixed           | MLQ         | DEWB                         | ee                       | emotional exhaustion                                      | CD<br>HD<br>ORG             | challenge stressors<br>hindrance stressors<br>organizational justice |
| Zhu et al., 2009     | 140         | South Africa | mixed           | MLQ         | AMWB                         | we                       | work engagement                                           | PERS                        | follower characteristics                                             |



| Authors, Year               | sample size | country        | economic sector | TFL measure | outcome variable | sub-category | variable name in study | type of work characteristic | work characteristic name in study |
|-----------------------------|-------------|----------------|-----------------|-------------|------------------|--------------|------------------------|-----------------------------|-----------------------------------|
| Zwingmann et al., 2014 (1)  | 1438        | Austria        | mixed           | MLQ         | PRWB             | prwb         | well-being             |                             |                                   |
| Zwingmann et al., 2014 (10) | 297         | Malaysia       | mixed           | MLQ         | PRWB             | prwb         | well-being             |                             |                                   |
| Zwingmann et al., 2014 (11) | 335         | Mexico         | mixed           | MLQ         | PRWB             | prwb         | well-being             |                             |                                   |
| Zwingmann et al., 2014 (12) | 1509        | Netherlands    | mixed           | MLQ         | PRWB             | prwb         | well-being             |                             |                                   |
| Zwingmann et al., 2014 (13) | 1464        | Slovakia       | mixed           | MLQ         | PRWB             | prwb         | well-being             |                             |                                   |
| Zwingmann et al., 2014 (14) | 988         | South Africa   | mixed           | MLQ         | PRWB             | prwb         | well-being             |                             |                                   |
| Zwingmann et al., 2014 (15) | 1881        | Spain          | mixed           | MLQ         | PRWB             | prwb         | well-being             |                             |                                   |
| Zwingmann et al., 2014 (16) | 327         | Switzerland    | mixed           | MLQ         | PRWB             | prwb         | well-being             |                             |                                   |
| Zwingmann et al., 2014 (2)  | 514         | nd             | mixed           | MLQ         | PRWB             | prwb         | well-being             |                             |                                   |
| Zwingmann et al., 2014 (3)  | 2032        | Brazil         | mixed           | MLQ         | PRWB             | prwb         | well-being             |                             |                                   |
| Zwingmann et al., 2014 (4)  | 290         | Croatia        | mixed           | MLQ         | PRWB             | prwb         | well-being             |                             |                                   |
| Zwingmann et al., 2014 (5)  | 249         | Czech Republic | mixed           | MLQ         | PRWB             | prwb         | well-being             |                             |                                   |
| Zwingmann et al., 2014 (6)  | 78339       | France         | mixed           | MLQ         | PRWB             | prwb         | well-being             |                             |                                   |
| Zwingmann et al., 2014 (7)  | 620         | Germany        | mixed           | MLQ         | PRWB             | prwb         | well-being             |                             |                                   |
| Zwingmann et al., 2014 (8)  | 3093        | Great Britain  | mixed           | MLQ         | PRWB             | prwb         | well-being             |                             |                                   |
| Zwingmann et al., 2014 (9)  | 200         | Hungary        | mixed           | MLQ         | PRWB             | prwb         | well-being             |                             |                                   |
| Zwingmann et al., 2014 (9)  | 200         | Italy          | mixed           | MLQ         | PRWB             | prwb         | well-being             |                             |                                   |

*Note:* MLQ = TFL measurement by Avolio & Bass, 1994, GTL = TFL measurement by Carless et al., 2000, TLI = TFL measurement by Podsakoff et al., 1996, TLS = TFL measurement by Rafferty & Griffin, 2004; AMWB = affective-motivational well-being, PRWB = pleased-relaxed well-being, DEWB = depressed-exhausted well-being, IDWB = irritated-distressed well-being, we = work engagement, ee = emotional exhaustion, dep = depersonalization, rpa = reduced personal accomplishment, js = job stress, irri = irritation, na = negative affect, posaff = positive affect; PERS = personal resource, TASK = task-related resource, REL = relational resource, ORG = organizational resource, CD = challenge demand, HD = hindrance demand
