# Supplementary material for: The Mediating Effects of Work Characteristics on the Relationship between Transformational Leadership and Employee Well-Being: A Meta-Analytic Investigation
Source: MDPI journal article supplement (doi:10.3390/ijerph19053133), 2022-03-07
Supplement: s1 [file s1]

**Table S3. Full Correlation Matrices for the SEM's.**

**Full Correlation Matrices for the SEM's.**

| <i>1. The Job Resources Model</i> |                        |                      |                    |                      |                      |                     |                     |                     |     |
|-----------------------------------|------------------------|----------------------|--------------------|----------------------|----------------------|---------------------|---------------------|---------------------|-----|
|                                   | TFL                    | AMWB                 | PRWB               | DEWB                 | IDWB                 | PERS                | TASK                | ORG                 | REL |
| 1. TFL                            | 1                      |                      |                    |                      |                      |                     |                     |                     |     |
|                                   | <b>.38</b>             |                      |                    |                      |                      |                     |                     |                     |     |
| 2. AMWB                           | (106, 121)<br>(45,629) | 1                    |                    |                      |                      |                     |                     |                     |     |
|                                   | <b>.35</b>             | <b>.47</b>           |                    |                      |                      |                     |                     |                     |     |
| 3. PRWB                           | (50, 51)<br>(114,430)  | (7, 11)<br>(4,932)   | 1                  |                      |                      |                     |                     |                     |     |
|                                   | <b>-.27</b>            | <b>-.42</b>          | <b>-.44</b>        |                      |                      |                     |                     |                     |     |
| 4. DEWB                           | (87, 140)<br>(39,005)  | (17, 44)<br>(7,432)  | (9, 15)<br>(8,136) | 1                    |                      |                     |                     |                     |     |
|                                   | <b>-.20</b>            | <b>-.30</b>          | <b>-.47</b>        | <b>.52</b>           |                      |                     |                     |                     |     |
| 5. IDWB                           | (64, 75)<br>(31,015)   | (15, 24)<br>(7,426)  | (7, 8)<br>(4,879)  | (19, 33)<br>(10,142) | 1                    |                     |                     |                     |     |
|                                   | <b>.27</b>             | <b>.41</b>           | <b>.31</b>         | <b>-.24</b>          | <b>-.22</b>          |                     |                     |                     |     |
| 6. PERS                           | (61, 80)<br>(28,434)   | (33, 67)<br>(12,329) | (7, 17)<br>(4,588) | (20, 54)<br>(13,215) | (20, 36)<br>(10,862) | 1                   |                     |                     |     |
|                                   | <b>.38</b>             | <b>.41</b>           | <b>.32</b>         | <b>-.28</b>          | <b>-.20</b>          | <b>.33</b>          |                     |                     |     |
| 7. TASK                           | (40, 71)<br>(16,577)   | (21, 41)<br>(9,273)  | (9, 17)<br>(4,660) | (17, 72)<br>(7,834)  | (11, 38)<br>(8,031)  | (12, 48)<br>(8,117) | 1                   |                     |     |
|                                   | <b>.51</b>             | <b>.41</b>           | <b>.33</b>         | <b>-.31</b>          | <b>-.20</b>          | <b>.33</b>          | <b>.43</b>          |                     |     |
| 8. ORG                            | (37, 46)<br>(22,263)   | (24, 36)<br>(10,516) | (5, 6)<br>(9,121)  | (15, 42)<br>(11,550) | (6, 13)<br>(6,338)   | (11, 19)<br>(6,565) | (14, 47)<br>(6,700) | 1                   |     |
|                                   | <b>.42</b>             | <b>.36</b>           | <b>.27</b>         | <b>-.28</b>          | <b>-.21</b>          | <b>.27</b>          | <b>.31</b>          | <b>.39</b>          |     |
| 9. REL                            | (28, 32)<br>(17,126)   | (15, 21)<br>(8,082)  | (6, 8)<br>(4,394)  | (16, 36)<br>(12,528) | (8, 14)<br>(5,422)   | (7, 19)<br>(10,041) | (17, 46)<br>(8,301) | (10, 19)<br>(5,786) | 1   |

2. The Job Demands Model

|         | TFL                                  | AMWB                               | PRWB                              | DEWB                               | IDWB                               | CD                                | HD |
|---------|--------------------------------------|------------------------------------|-----------------------------------|------------------------------------|------------------------------------|-----------------------------------|----|
| 1. TFL  | 1                                    |                                    |                                   |                                    |                                    |                                   |    |
| 2. AMWB | <b>.38</b><br>(106, 121)<br>(45,629) | 1                                  |                                   |                                    |                                    |                                   |    |
| 3. PRWB | <b>.35</b><br>(50, 51)<br>(114,430)  | <b>.47</b><br>(7, 11)<br>(4,932)   | 1                                 |                                    |                                    |                                   |    |
| 4. DEWB | <b>-.27</b><br>(87, 140)<br>(39,005) | <b>-.42</b><br>(17, 44)<br>(7,432) | <b>-.44</b><br>(9, 15)<br>(8,136) | 1                                  |                                    |                                   |    |
| 5. IDWB | <b>-.20</b><br>(64, 75)<br>(31,015)  | <b>-.30</b><br>(15, 24)<br>(7,426) | <b>-.47</b><br>(7, 8)<br>(4,879)  | <b>.52</b><br>(19, 33)<br>(10,142) | 1                                  |                                   |    |
| 6. CD   | <b>-.20</b><br>(20, 23)<br>(12,538)  | <b>-.15</b><br>(7, 18)<br>(5,128)  | <b>-.21</b><br>(6, 9)<br>(4,382)  | <b>.38</b><br>(13, 25)<br>(7,475)  | <b>.30</b><br>(10, 20)<br>(7,878)  | 1                                 |    |
| 7. HD   | <b>-.28</b><br>(24, 48)<br>(17,789)  | <b>-.27</b><br>(9, 32)<br>(8,723)  | <b>-.31</b><br>(7, 12)<br>(4,565) | <b>.36</b><br>(14, 62)<br>(7,393)  | <b>.37</b><br>(13, 51)<br>(10,718) | <b>.30</b><br>(12, 41)<br>(9,395) | 1  |

3. The Comparison Model

|         | TFL                                  | AMWB                                | PRWB                               | DEWB                                 | IDWB                                | JD                                   | JR                                  | PERS |
|---------|--------------------------------------|-------------------------------------|------------------------------------|--------------------------------------|-------------------------------------|--------------------------------------|-------------------------------------|------|
| 1. TFL  | 1                                    |                                     |                                    |                                      |                                     |                                      |                                     |      |
| 2. AMWB | <b>.38</b><br>(106, 121)<br>(45,629) | 1                                   |                                    |                                      |                                     |                                      |                                     |      |
| 3. PRWB | <b>.35</b><br>(50, 51)<br>(114,430)  | <b>.47</b><br>(7, 11)<br>(4,932)    | 1                                  |                                      |                                     |                                      |                                     |      |
| 4. DEWB | <b>-.27</b><br>(87, 140)<br>(39,005) | <b>-.42</b><br>(17, 44)<br>(7,432)  | <b>-.44</b><br>(9, 15)<br>(8,136)  | 1                                    |                                     |                                      |                                     |      |
| 5. IDWB | <b>-.20</b><br>(64, 75)<br>(31,015)  | <b>-.30</b><br>(15, 24)<br>(7,426)  | <b>-.47</b><br>(7, 8)<br>(4,879)   | <b>.52</b><br>(19, 33)<br>(10,142)   | 1                                   |                                      |                                     |      |
| 6. JD   | <b>-.25</b><br>(33, 71)<br>(21,247)  | <b>-.22</b><br>(11, 50)<br>(9,491)  | <b>-.28</b><br>(10, 21)<br>(5,648) | <b>.38</b><br>(20, 87)<br>(9,649)    | <b>.36</b><br>(16, 71)<br>(11,628)  | 1                                    |                                     |      |
| 7. JR   | <b>.45</b><br>(78, 170)<br>(43,093)  | <b>.39</b><br>(44, 107)<br>(18,298) | <b>.30</b><br>(14, 34)<br>(12,207) | <b>-.29</b><br>(29, 167)<br>(21,127) | <b>-.20</b><br>(17, 81)<br>(11,468) | <b>-.23</b><br>(19, 221)<br>(11,411) | 1                                   |      |
| 8. PERS | <b>.27</b><br>(61, 80)<br>(28,434)   | <b>.41</b><br>(33, 67)<br>(12,329)  | <b>.31</b><br>(7, 17)<br>(4,588)   | <b>-.24</b><br>(20, 54)<br>(13,215)  | <b>-.22</b><br>(20, 36)<br>(10,862) | <b>-.10</b><br>(12, 72)<br>(8,419)   | <b>.30</b><br>(22, 115)<br>(16,587) | 1    |

4. SEM with all work characteristics and one well-being indicator - AMWB

|         | TFL                                  | AMWB                               | CD                                 | HD                                 | PERS                              | TASK                              | ORG                               | REL |
|---------|--------------------------------------|------------------------------------|------------------------------------|------------------------------------|-----------------------------------|-----------------------------------|-----------------------------------|-----|
| 1. TFL  | 1                                    |                                    |                                    |                                    |                                   |                                   |                                   |     |
| 2. AMWB | <b>.38</b><br>(106, 121)<br>(45,629) | 1                                  |                                    |                                    |                                   |                                   |                                   |     |
| 3. CD   | <b>-.19</b><br>(20, 23)<br>(12,538)  | <b>-.13</b><br>(7, 18)<br>(5,128)  | 1                                  |                                    |                                   |                                   |                                   |     |
| 4. HD   | <b>-.27</b><br>(24, 48)<br>(17,789)  | <b>-.24</b><br>(9, 32)<br>(8,723)  | <b>.32</b><br>(12, 41)<br>(9,395)  | 1                                  |                                   |                                   |                                   |     |
| 5. PERS | <b>.28</b><br>(61, 80)<br>(28,434)   | <b>.43</b><br>(33, 67)<br>(12,329) | <b>-.01</b><br>(8, 31)<br>(7,425)  | <b>-.14</b><br>(10, 41)<br>(7,572) | 1                                 |                                   |                                   |     |
| 6. TASK | <b>.39</b><br>(40, 71)<br>(16,577)   | <b>.41</b><br>(21, 41)<br>(9,273)  | <b>-.16</b><br>(11, 35)<br>(8,204) | <b>-.23</b><br>(12, 81)<br>(8,468) | <b>.35</b><br>(12, 48)<br>(8,117) | 1                                 |                                   |     |
| 7. ORG  | <b>.51</b><br>(37, 46)<br>(22,263)   | <b>.41</b><br>(24, 36)<br>(10,516) | <b>-.24</b><br>(6, 9)<br>(4,585)   | <b>-.23</b><br>(7, 21)<br>(4,870)  | <b>.34</b><br>(11, 19)<br>(6,565) | <b>.42</b><br>(14, 47)<br>(6,700) | 1                                 |     |
| 8. REL  | <b>.43</b><br>(28, 32)<br>(17,126)   | <b>.37</b><br>(15, 21)<br>(8,082)  | <b>-.15</b><br>(6, 10)<br>(4,933)  | <b>-.20</b><br>(12, 39)<br>(7,311) | <b>.27</b><br>(7, 19)<br>(10,041) | <b>.32</b><br>(17, 46)<br>(8,301) | <b>.40</b><br>(10, 19)<br>(5,786) | 1   |

5. SEM with all work characteristics and one well-being indicator - PRWB

|         | TFL                                 | PRWB                              | CD                                 | HD                                 | PERS                              | TASK                              | ORG                               | REL |
|---------|-------------------------------------|-----------------------------------|------------------------------------|------------------------------------|-----------------------------------|-----------------------------------|-----------------------------------|-----|
| 1. TFL  | 1                                   |                                   |                                    |                                    |                                   |                                   |                                   |     |
| 2. PRWB | <b>.35</b><br>(50, 51)<br>(114,430) | 1                                 |                                    |                                    |                                   |                                   |                                   |     |
| 3. CD   | <b>-.20</b><br>(20, 23)<br>(12,538) | <b>-.22</b><br>(6, 9)<br>(4,382)  | 1                                  |                                    |                                   |                                   |                                   |     |
| 4. HD   | <b>-.28</b><br>(24, 48)<br>(17,789) | <b>-.31</b><br>(7, 12)<br>(4,565) | <b>.30</b><br>(12, 41)<br>(9,395)  | 1                                  |                                   |                                   |                                   |     |
| 5. PERS | <b>.27</b><br>(61, 80)<br>(28,434)  | <b>.31</b><br>(7, 17)<br>(4,588)  | <b>-.03</b><br>(8, 31)<br>(7,425)  | <b>-.15</b><br>(10, 41)<br>(7,572) | 1                                 |                                   |                                   |     |
| 6. TASK | <b>.38</b><br>(40, 71)<br>(16,577)  | <b>.32</b><br>(9, 17)<br>(4,660)  | <b>-.18</b><br>(11, 35)<br>(8,204) | <b>-.24</b><br>(12, 81)<br>(8,468) | <b>.33</b><br>(12, 48)<br>(8,117) | 1                                 |                                   |     |
| 7. ORG  | <b>.51</b><br>(37, 46)<br>(22,263)  | <b>.33</b><br>(5, 6)<br>(9,121)   | <b>-.26</b><br>(6, 9)<br>(4,585)   | <b>-.24</b><br>(7, 21)<br>(4,870)  | <b>.33</b><br>(11, 19)<br>(6,565) | <b>.40</b><br>(14, 47)<br>(6,700) | 1                                 |     |
| 8. REL  | <b>.42</b><br>(28, 32)<br>(17,126)  | <b>.28</b><br>(6, 8)<br>(4,394)   | <b>-.16</b><br>(6, 10)<br>(4,933)  | <b>-.22</b><br>(12, 39)<br>(7,311) | <b>.27</b><br>(7, 19)<br>(10,041) | <b>.30</b><br>(17, 46)<br>(8,301) | <b>.38</b><br>(10, 19)<br>(5,786) | 1   |

6. SEM with all work characteristics and one well-being indicator - DEWB

|         | TFL                                  | DEWB                                | CD                                 | HD                                 | PERS                              | TASK                              | ORG                               | REL |
|---------|--------------------------------------|-------------------------------------|------------------------------------|------------------------------------|-----------------------------------|-----------------------------------|-----------------------------------|-----|
| 1. TFL  | 1                                    |                                     |                                    |                                    |                                   |                                   |                                   |     |
| 2. DEWB | <b>-.28</b><br>(87, 140)<br>(39,005) | 1                                   |                                    |                                    |                                   |                                   |                                   |     |
| 3. CD   | <b>-.21</b><br>(20, 23)<br>(12,538)  | <b>.37</b><br>(13, 25)<br>(7,475)   | 1                                  |                                    |                                   |                                   |                                   |     |
| 4. HD   | <b>-.29</b><br>(24, 48)<br>(17,789)  | <b>.35</b><br>(14, 62)<br>(7,393)   | <b>.29</b><br>(12, 41)<br>(9,395)  | 1                                  |                                   |                                   |                                   |     |
| 5. PERS | <b>.27</b><br>(61, 80)<br>(28,434)   | <b>-.25</b><br>(20, 54)<br>(13,215) | <b>-.04</b><br>(8, 31)<br>(7,425)  | <b>-.17</b><br>(10, 41)<br>(7,572) | 1                                 |                                   |                                   |     |
| 6. TASK | <b>.37</b><br>(40, 71)<br>(16,577)   | <b>-.31</b><br>(17, 72)<br>(7,834)  | <b>-.20</b><br>(11, 35)<br>(8,204) | <b>-.26</b><br>(12, 81)<br>(8,468) | <b>.32</b><br>(12, 48)<br>(8,117) | 1                                 |                                   |     |
| 7. ORG  | <b>.50</b><br>(37, 46)<br>(22,263)   | <b>-.32</b><br>(15, 42)<br>(11,550) | <b>-.28</b><br>(6, 9)<br>(4,585)   | <b>-.26</b><br>(7, 21)<br>(4,870)  | <b>.32</b><br>(11, 19)<br>(6,565) | <b>.40</b><br>(14, 47)<br>(6,700) | 1                                 |     |
| 8. REL  | <b>.41</b><br>(28, 32)<br>(17,126)   | <b>-.29</b><br>(16, 36)<br>(12,528) | <b>-.18</b><br>(6, 10)<br>(4,933)  | <b>-.24</b><br>(12, 39)<br>(7,311) | <b>.26</b><br>(7, 19)<br>(10,041) | <b>.29</b><br>(17, 46)<br>(8,301) | <b>.37</b><br>(10, 19)<br>(5,786) | 1   |

7. SEM with all work characteristics and one well-being indicator - IDWB

|         | TFL                                 | IDWB                                | CD                                 | HD                                 | PERS                              | TASK                              | ORG                               | REL |
|---------|-------------------------------------|-------------------------------------|------------------------------------|------------------------------------|-----------------------------------|-----------------------------------|-----------------------------------|-----|
| 1. TFL  | 1                                   |                                     |                                    |                                    |                                   |                                   |                                   |     |
| 2. IDWB | <b>-.20</b><br>(64, 75)<br>(31,015) | 1                                   |                                    |                                    |                                   |                                   |                                   |     |
| 3. CD   | <b>-.20</b><br>(20, 23)<br>(12,538) | <b>.30</b><br>(10, 20)<br>(7,878)   | 1                                  |                                    |                                   |                                   |                                   |     |
| 4. HD   | <b>-.28</b><br>(24, 48)<br>(17,789) | <b>.38</b><br>(13, 51)<br>(10,718)  | <b>.30</b><br>(12, 41)<br>(9,395)  | 1                                  |                                   |                                   |                                   |     |
| 5. PERS | <b>.27</b><br>(61, 80)<br>(28,434)  | <b>-.20</b><br>(20, 36)<br>(10,862) | <b>-.02</b><br>(8, 31)<br>(7,425)  | <b>-.15</b><br>(10, 41)<br>(7,572) | 1                                 |                                   |                                   |     |
| 6. TASK | <b>.38</b><br>(40, 71)<br>(16,577)  | <b>-.19</b><br>(11, 38)<br>(8,031)  | <b>-.18</b><br>(11, 35)<br>(8,204) | <b>-.24</b><br>(12, 81)<br>(8,468) | <b>.33</b><br>(12, 48)<br>(8,117) | 1                                 |                                   |     |
| 7. ORG  | <b>.51</b><br>(37, 46)<br>(22,263)  | <b>-.20</b><br>(6, 13)<br>(6,338)   | <b>-.26</b><br>(6, 9)<br>(4,585)   | <b>-.24</b><br>(7, 21)<br>(4,870)  | <b>.33</b><br>(11, 19)<br>(6,565) | <b>.40</b><br>(14, 47)<br>(6,700) | 1                                 |     |
| 8. REL  | <b>.42</b><br>(28, 32)<br>(17,126)  | <b>-.21</b><br>(8, 14)<br>(5,422)   | <b>-.16</b><br>(6, 10)<br>(4,933)  | <b>-.22</b><br>(12, 39)<br>(7,311) | <b>.27</b><br>(7, 19)<br>(10,041) | <b>.30</b><br>(17, 46)<br>(8,301) | <b>.38</b><br>(10, 19)<br>(5,786) | 1   |

Note: first number in parentheses = number of studies, second number in parentheses = number of correlations, number in parentheses and italics = the n for this correlation, TFL = transformational leadership, AMWB = affective-motivational well-being, PRWB = pleased-relaxed well-being, DEWB = depressed-exhausted well-being, IDWB = irritated-distressed well-being, CD = challenge demands, HD = hindrance demands, PERS = personal resources, TASK = task-related resources, ORG = organizational resources, REL = relational resources, JD = job demands, JR = job resources.
